# Supplementary material
Source: PubMed Central journal article supplement (PMC9578380)
Supplement: NIHMS1832615-supplement-supplementary_material.pdf [file NIHMS1832615-supplement-supplementary_material.pdf]

## Supplementary Online Content

Osler T, Glance LG, Li W, Buzas JS, Hosmer DW. Survival rates in trauma patients following health care reform in Massachusetts. *JAMA Surgery*. Published online May 6, 2015.  
doi:10.1001/jamasurg.2014.2464.

**eTable 1.** Excess Deaths for Massachusetts and New York by Year for Patients Younger Than 65 Years

**eTable 2.** Excess Deaths for Massachusetts and New York by Year for Patients Older Than 64 Years

This supplementary material has been provided by the authors to give readers additional information about their work.

eTable 1. Excess Deaths for Massachusetts and New York by Year for Patients Younger Than 65 Years

| State | Year | Young Excess deaths | Upper 95% CI | Lower 95% CI |
|-------|------|---------------------|--------------|--------------|
| MA    | 2002 | 2.654666            | 4.245879     | 0.845475     |
| MA    | 2003 | 1.429138            | 2.922719     | -0.42539     |
| MA    | 2004 | 0.889889            | 2.561548     | -0.70028     |
| MA    | 2005 | -1.28969            | -0.07629     | -3.10203     |
| MA    | 2006 | -1.77688            | -0.08862     | -3.34599     |
| MA    | 2007 | -3.19397            | -1.79865     | -4.98508     |
| MA    | 2008 | -0.78276            | 0.806101     | -2.43165     |
| MA    | 2009 | -1.19546            | 0.130796     | -2.90484     |
| MA    | 2010 | -2.89859            | -1.14504     | -4.2861      |
| MA    | 2011 | -4.15349            | -2.70513     | -5.59626     |
| NY    | 2002 | 3.913014            | 4.723404     | 2.914754     |
| NY    | 2003 | 3.66169             | 4.584256     | 2.719755     |
| NY    | 2004 | 2.853355            | 3.688776     | 1.769301     |
| NY    | 2005 | 1.615891            | 2.363065     | 0.681599     |
| NY    | 2006 | 0.527194            | 1.395666     | -0.15535     |
| NY    | 2007 | 0.12767             | 0.895708     | -0.86736     |
| NY    | 2008 | -1.10428            | -0.3891      | -1.98218     |
| NY    | 2009 | -1.78205            | -0.84665     | -2.75575     |
| NY    | 2010 | -2.65507            | -1.93941     | -3.49027     |
| NY    | 2011 | -2.12585            | -1.16067     | -3.00707     |

eTable 2. Excess Deaths for Massachusetts and New York by Year for Patients Older Than 64 Years

| State | Year | Elderly Excess deaths | Upper 95% CI | Lower 95% CI |
|-------|------|-----------------------|--------------|--------------|
| MA    | 2002 | 4.074134              | 6.931927     | 1.85519      |
| MA    | 2003 | 4.054235              | 6.486469     | 1.349675     |
| MA    | 2004 | 1.251074              | 3.715547     | -1.54697     |
| MA    | 2005 | -3.21667              | -1.1887      | -5.37753     |
| MA    | 2006 | -4.50924              | -2.02833     | -6.64874     |
| MA    | 2007 | -5.36114              | -3.65246     | -7.93577     |
| MA    | 2008 | -4.07071              | -1.59203     | -7.16339     |
| MA    | 2009 | -6.20222              | -3.40363     | -8.23488     |
| MA    | 2010 | -8.20436              | -5.67444     | -10.5381     |
| MA    | 2011 | -10.0358              | -7.4899      | -12.5376     |
| NY    | 2002 | 11.60161              | 13.26749     | 9.414164     |
| NY    | 2003 | 9.320941              | 10.97431     | 6.734282     |
| NY    | 2004 | 7.232402              | 9.018932     | 5.216717     |
| NY    | 2005 | 4.184373              | 5.854447     | 2.625028     |
| NY    | 2006 | 2.008899              | 3.685429     | 0.51733      |
| NY    | 2007 | -2.00431              | -0.72553     | -3.99462     |
| NY    | 2008 | -0.50503              | 1.323473     | -1.89032     |
| NY    | 2009 | -3.16607              | -1.33265     | -5.3227      |
| NY    | 2010 | -5.90406              | -4.15425     | -7.44702     |
| NY    | 2011 | -4.83621              | -3.57868     | -6.65645     |
